# Supplementary material
Source: PubMed Central journal article supplement (PMC6708767)
Supplement: NIHMS1536095-supplement-1.pdf [file NIHMS1536095-supplement-1.pdf]

# Supplemental Figure 1

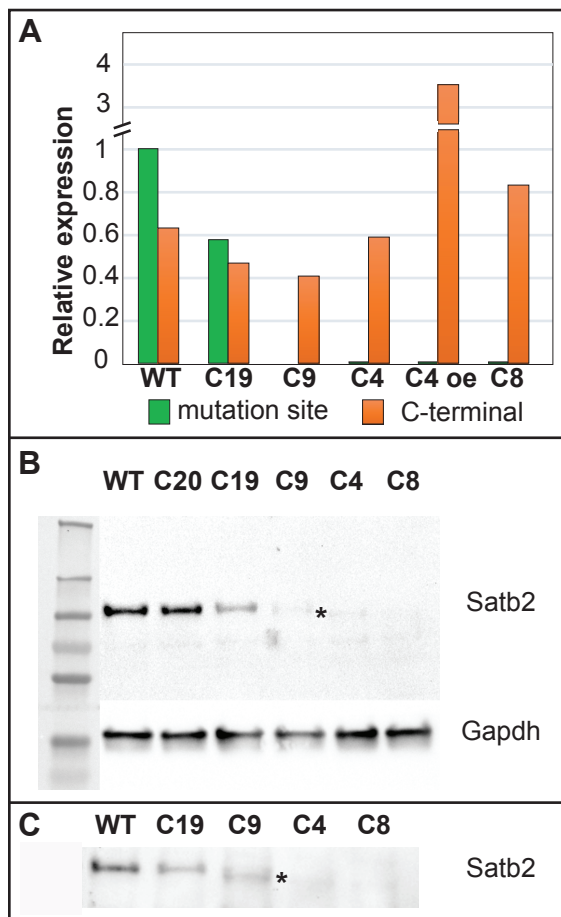

Supplemental Figure 2

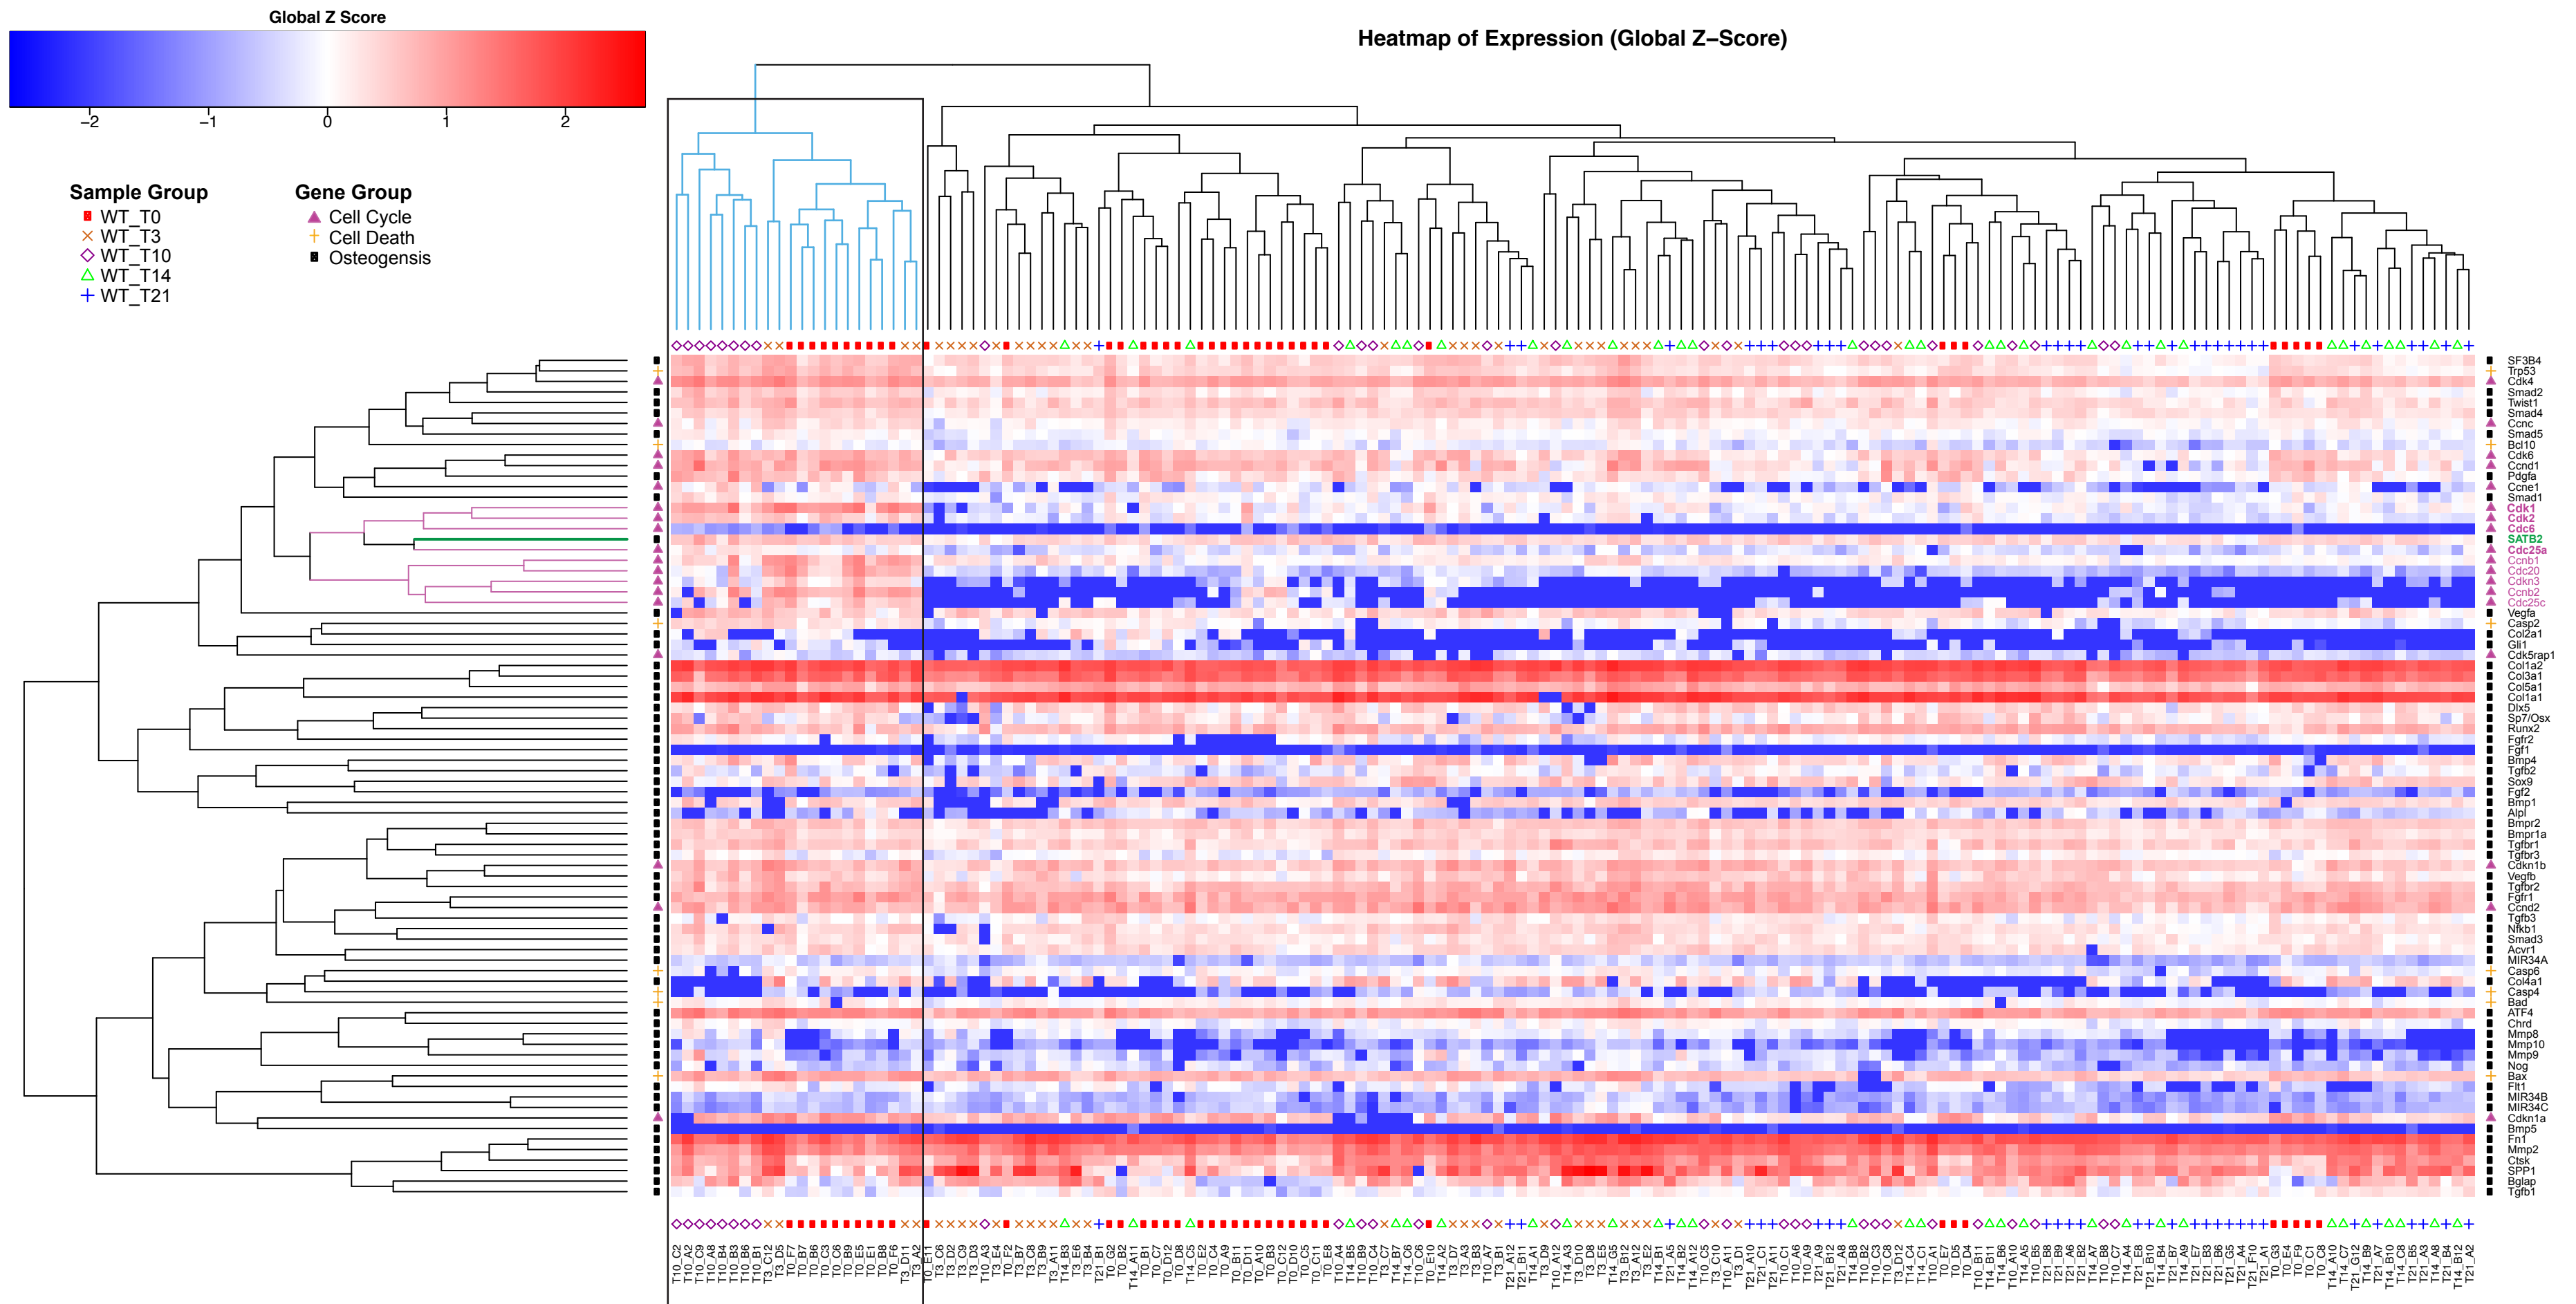

# Supplemental Figure 3

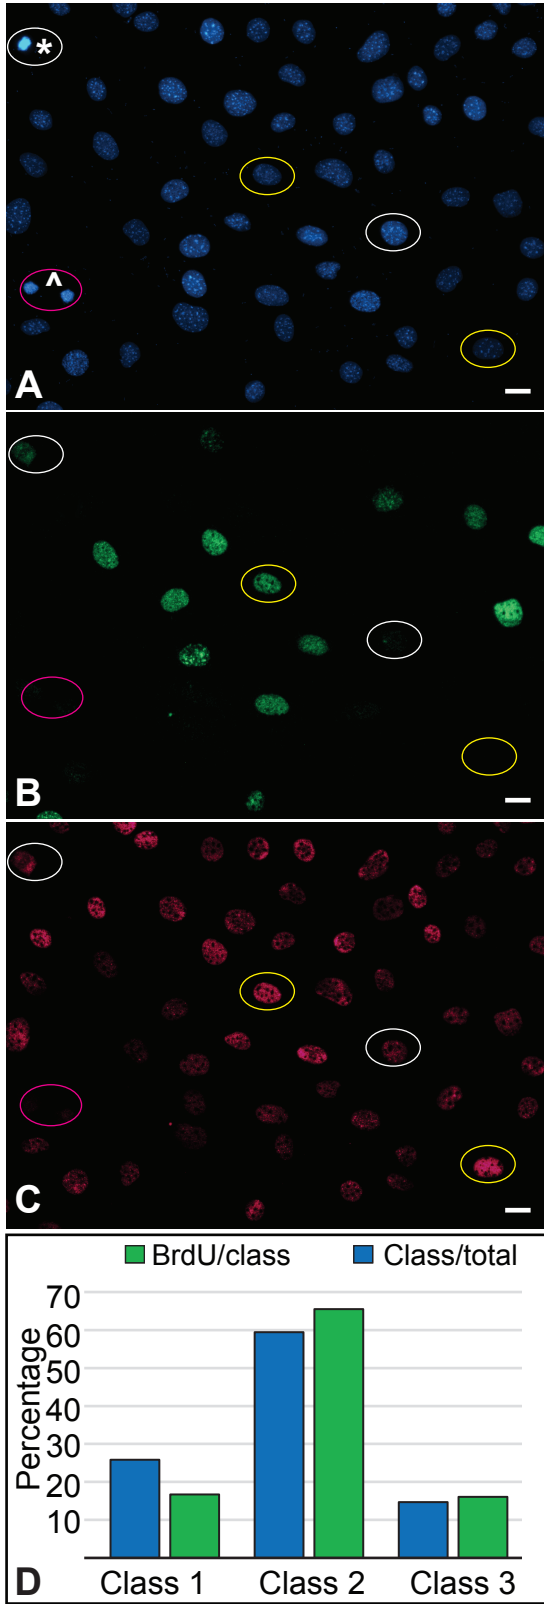

# Supplemental Figure 4

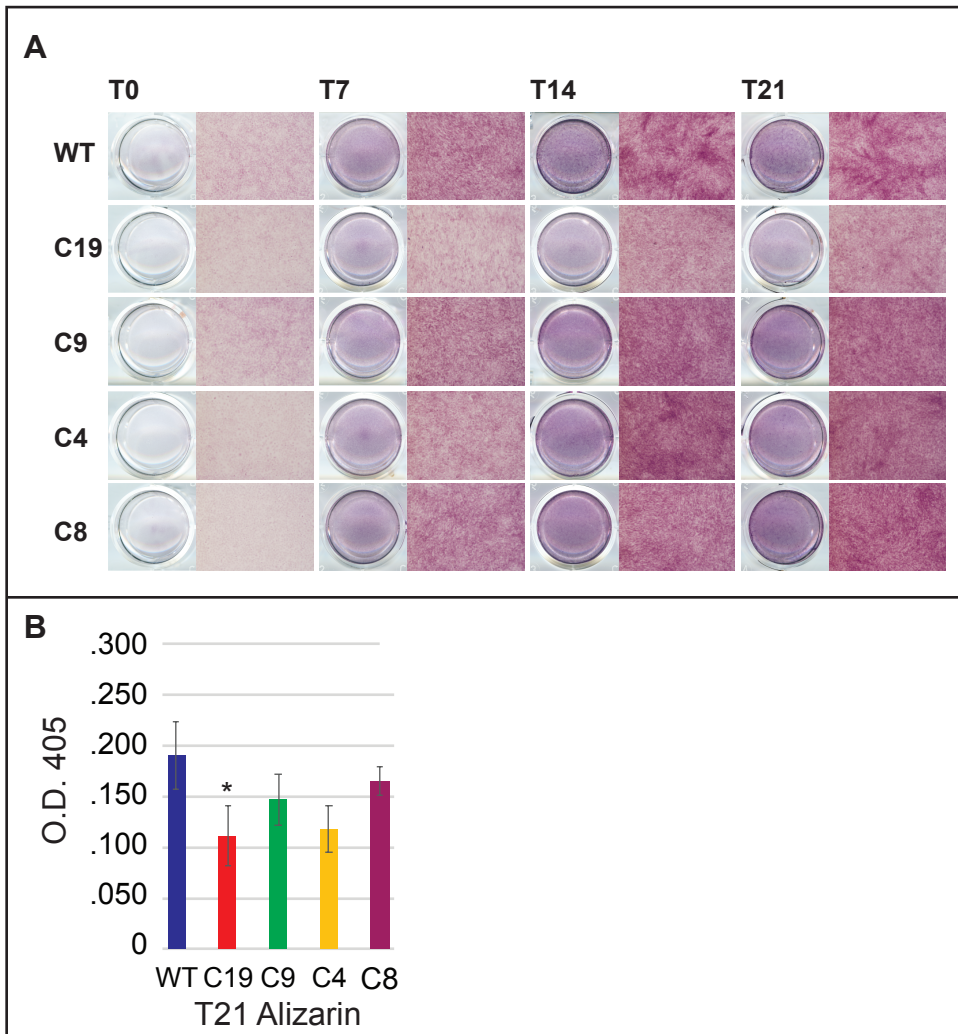



# Supplemental Figure 5

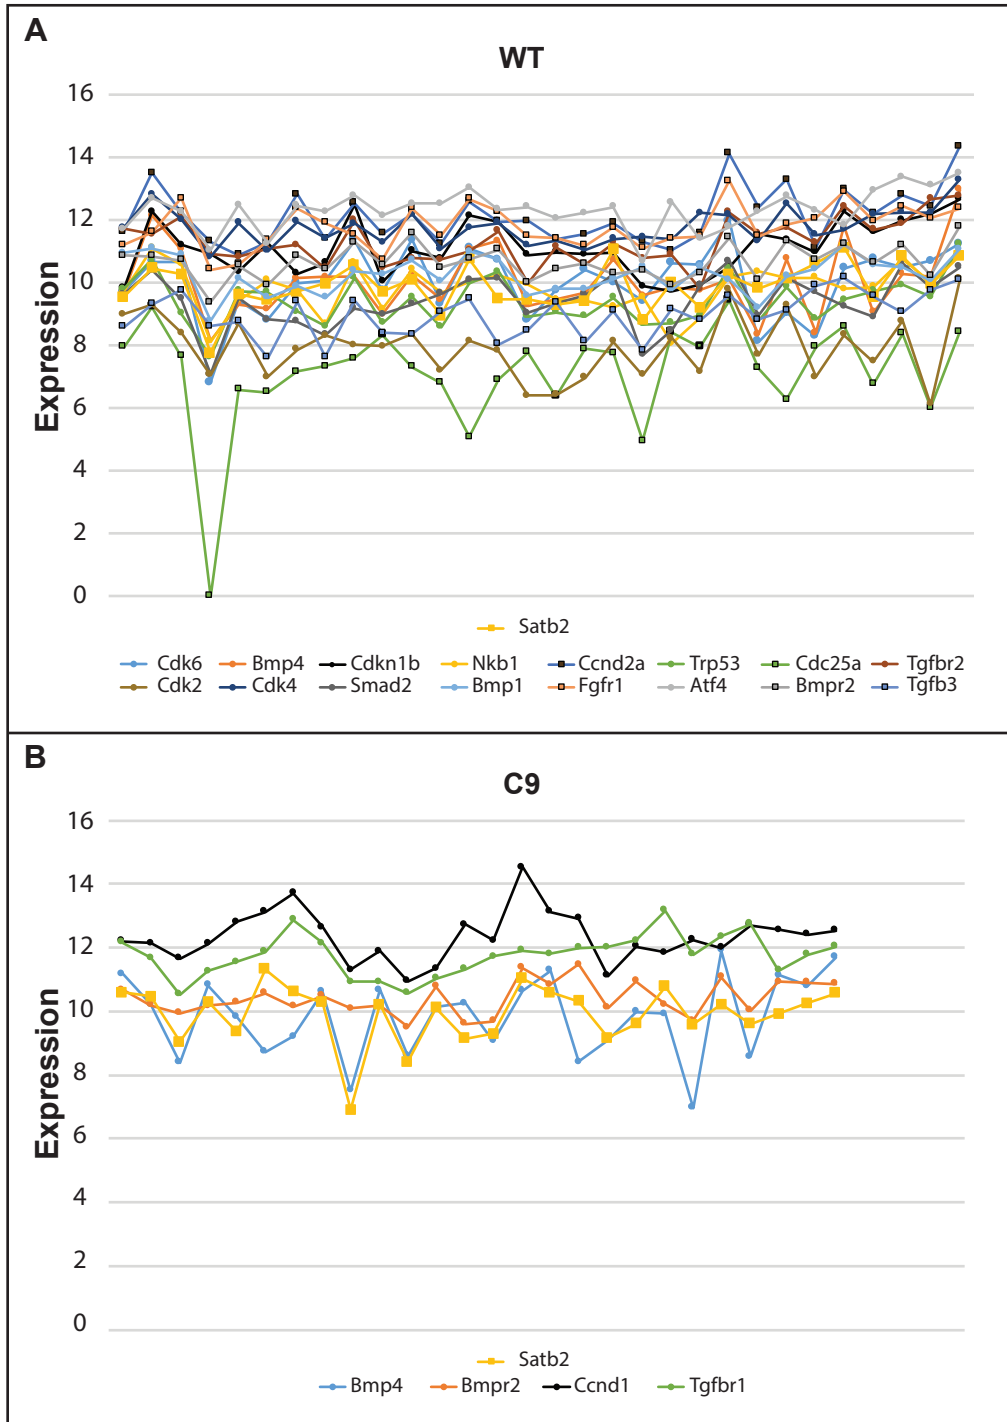



| Target          | Forward Primer           | Reverse Primer           | Design RefSeq  | Gene Symbol |
|-----------------|--------------------------|--------------------------|----------------|-------------|
| <b>Actb</b>     | ACAGCTTCTTTGCAGCTCCT     | AGCGCAGCGATATCGTCAT      | NM_007393.5    | Actb        |
| <b>Acvr1</b>    | TGATGATGGCTTTCCCTTCC     | CCCTCACACACACACATGTA     | NM_007394.3    | Acvr1       |
| <b>Alpl</b>     | GCAATGAGGTCACATCCATCC    | GTTACCCGAGTGGTAGTCA      | NM_007431.2    | Alpl        |
| <b>ATF4</b>     | GCCAAGCACTTGAAACCTCA     | CATCCAATCTGTCCCGGAAAA    | NM_009716.2    | Atf4        |
| <b>Bad</b>      | GCAGCCACCAACAGTCATCA     | GTACGAACTGTGGCGACTCC     | NM_007522.2    | Bad         |
| <b>Bax</b>      | GCGTGGTTGCCCTCTTCTA      | CTGATCAGCTCGGGCACTTTA    | NM_007527.3    | Bax         |
| <b>Bcl10</b>    | CTCACGGAGGAGGATTTGAC     | TTTCTCACACAGGTA AACACGTA | NM_009740.1    | Bcl10       |
| <b>Bglap</b>    | GAACAGACAAGTCCCACACA     | GTCAGCAGAGTGAGCAGAAA     | NM_007541.2    | Bglap       |
| <b>Bmp1</b>     | CCGTTTGTGATTGGAGGGAA     | ATGCTTCTCCCAGTGTCTCA     | NM_009755.3    | Bmp1        |
| <b>Bmp2</b>     | GTGCGCAGCTTCCATCAC       | CGTCACTGGGGACAGA ACTTAA  | NM_007553.2    | Bmp2        |
| <b>Bmp3</b>     | CGGCTGGAGCGAATGGATTA     | GTGGCGTGATTTGATGGTTTCA   | NM_173404.3    | Bmp3        |
| <b>Bmp4</b>     | GAACCGGGCTTGAGTACCC      | GGTCCCTGGGATGTTCTCC      | NM_007554.2    | Bmp4        |
| <b>Bmp5</b>     | CTGCAAGAAGCACGAACTCTA    | AGCATACCCTTCTGGTGCTA     | NM_007555.3    | Bmp5        |
| <b>Bmp6</b>     | CCAAGTCTTG CAGGAGCATCA   | CCTTCTTCTGAGGCCACAC      | NM_007556.2    | Bmp6        |
| <b>Bmp7</b>     | TGTACGTCAGCTTCCGAGAC     | GTAGTAGGCAGCATAGCCTTCA   | NM_007557.2    | Bmp7        |
| <b>Bmpr1a</b>   | GGAAATGGCTCGTCGTTGTA     | CACTGGGCACCATGTTGTAA     | NM_009758.4    | Bmpr1a      |
| <b>Bmpr1b</b>   | GAAGTTACGGCCTTCATTCCC    | GCACTCTGTCATAAGCTTCCC    | NM_007560.3    | Bmpr1b      |
| <b>Bmpr2</b>    | GGGGAAGAAGATAATGCGGCTA   | GGTTCACAGCTCCTTCTAGCA    | NM_007561.3    | Bmpr2       |
| <b>Casp2</b>    | TCCAAGTCTACAGAACAAGCCAAA | TCCATCTTGCTGGTCGACAC     | NM_007610.1    | Casp2       |
| <b>Casp4</b>    | CCACGTGGAGAAGGACTTCA     | TCCTGTTTTGTCTCGGTAGGAC   | NM_007609.3    | Casp4       |
| <b>Casp6</b>    | ACAGAAACCGATGGCTTCTACA   | TCCTCTTGTGGTCCATCTTGTAC  | NM_009811.4    | Casp6       |
| <b>Ccnb1</b>    | GCTGCTTCAGGAGACCATGTA    | TAGCATCTTCTTGGGCACACA    | NM_172301.3    | Ccnb1       |
| <b>Ccnb2</b>    | GCCTCTTGCCTGTCTCAGAA     | CACTCTCCATGTAGCCTGTGTA   | NM_007630.2    | Ccnb2       |
| <b>Ccnc</b>     | ACGGATCTCTGTCTGCTGTA     | TGTTGTACGACACAGGCTAC     | NM_016746.3    | Ccnc        |
| <b>Ccnd1</b>    | TGCCGAGAAGTTGTGCATCTA    | TGTTACCAGAAGCAGTTCCA     | NM_007631.2    | Ccnd1       |
| <b>Ccnd2</b>    | TGCGGAAAAGCTGTGCATTTA    | ACCCAACACTACCAGTTCCC     | NM_009829.3    | Ccnd2       |
| <b>Ccne1</b>    | CTGTGAAAAGCGAGGATAGCA    | TGTTAGGGGTGGGGATGAAA     | NM_007633.2    | Ccne1       |
| <b>Cdc20</b>    | TCCCCTGCAAACATTCACTCA    | ATATTGGA CTGCCAGGGACAC   | NM_023223.2    | Cdc20       |
| <b>Cdc25a</b>   | TTGGACAGTGACCCAAGAGAC    | AATCCTGATGCTTCCCAGAGAC   | NM_007658.3    | Cdc25a      |
| <b>Cdc25c</b>   | GATGTCTGCCTCTCCGCTTA     | CTATCCAGAGGTCCAGATGAATCC | NM_009860.2    | Cdc25c      |
| <b>Cdc6</b>     | TCTGCTGTTTCAGGAGACATCC   | CCTGACATCCGACTCCACAA     | NM_001025779.1 | Cdc6        |
| <b>Cdk1</b>     | AAGTACCTGGACTCCATCCC     | TCCCTGGAGGATTTGGTGTA     | NM_007659.3    | Cdk1        |
| <b>Cdk2</b>     | GGAGAAGTTGTGGCGCTTAA     | GAGATCTCTCGGATGGCAGTA    | NM_183417.3    | Cdk2        |
| <b>Cdk4</b>     | ATGTGGAGCGTTGGCTGTA      | TGGTCGGCTTCAGAGTTTCC     | NM_009870.3    | Cdk4        |
| <b>Cdk5rap1</b> | TCCTACCCCAAGGATTTTCC     | CTGGCAGGTGGATCTGCTTA     | NM_025876.2    | Cdk5rap1    |
| <b>Cdk6</b>     | TGGAAGTTCAGACGTGGATCA    | GTCCCTAGGCCAGTCTTCC      | NM_009873.2    | Cdk6        |
| <b>Cdkn1a</b>   | GAACATCTCAGGGCCGAAAAC    | TCTGCGCTTGGAGTGATAGAA    | NM_007669.4    | Cdkn1a      |

|                |                          |                         |                |         |
|----------------|--------------------------|-------------------------|----------------|---------|
| <b>Cdkn1b</b>  | CAGTGTCCAGGGATGAGGAA     | TTCGGGGAACCGTCTGAAA     | NM_009875.4    | Cdkn1b  |
| <b>Cdkn3</b>   | CAGACGAAGAACCTGTTGATGAA  | ATTCACTCGCGACAGAGGTA    | NM_028222.1    | Cdkn3   |
| <b>Chrd</b>    | CCTTTGGGGAGATGAGCTGTA    | GAACAATCGTCCCGCTCAC     | NM_009893.2    | Chrd    |
| <b>Col10a1</b> | TTGCTAGCCCAAGACACAA      | GCCTTGTTCTCCTCTTACTGGAA | NM_009925.4    | Col10a1 |
| <b>Col14a1</b> | TGGTCAGATCAAGAGGACCAA    | GGCCCATGATGTAGAGCAAA    | NM_181277.3    | Col14a1 |
| <b>Col1a1</b>  | TTCAGGGAATGCCTGGTGAA     | ACCTTTGGGACCAGCATCA     | NM_007742.3    | Col1a1  |
| <b>Col1a2</b>  | GAAAAGGGTCCCTCTGGAGAA    | AATACCGGGAGCACCAAGAA    | NM_007743.2    | Col1a2  |
| <b>Col2a1</b>  | GCACTTGCCAAGACCTGAAA     | CCTGGTTGGGATCAATCCAGTA  | NM_031163.3    | Col2a1  |
| <b>Col3a1</b>  | TGCTGGAAAGAATGGGGAGAC    | GGTCCAGAATCTCCCTTGTCAC  | NM_009930.2    | Col3a1  |
| <b>Col4a1</b>  | TCTGGCTGTGGAAAATGTGAC    | TCCAATGACACCTTGCAACC    | NM_009931.2    | Col4a1  |
| <b>Col5a1</b>  | GGTCCTTTGGGGAAACCA       | CTGGAGGACCTTCTTTTCCA    | NM_015734.2    | Col5a1  |
| <b>Ctsk</b>    | AGGGAAGCAAGCACTGGATA     | TTCCGAGCCAAGAGAGCATA    | NM_007802.3    | Ctsk    |
| <b>Dlx5</b>    | TCTCTAGGACTGACGCAAAC     | TGACTGTGGCGAGTTACAC     | NM_010056.2    | Dlx5    |
| <b>Fgf1</b>    | TGGACACCGAAGGGCTTTTA     | GCATGCTTCTTGGAGGTGTA    | NM_010197.3    | Fgf1    |
| <b>Fgf2</b>    | TCTTCCTGCGCATCCATCC      | GCACACACTCCCTTGATAGACA  | NM_008006.2    | Fgf2    |
| <b>Fgfr1</b>   | GAGTAAGATCGGGCCAGACA     | TCCATTTCTTGTGCGGTGGTA   | NM_001079908.1 | Fgfr1   |
| <b>Fgfr2</b>   | TCAAGTGGATGGCTCCTGAA     | CACATTAACACCCCGAAGGAC   | NM_010207.2    | Fgfr2   |
| <b>Flt1</b>    | TTGCACGGGAGAGACTGAAA     | GCCAAATGCAGAGGCTTGAA    | NM_010228.3    | Flt1    |
| <b>Fn1</b>     | GGAACCAGCAGAGTCCCAAA     | CCTCGGTGTTGTAAGGTGGAA   | NM_001276413.1 | Fn1     |
| <b>Gapdh</b>   | CAAGGTCATCCCAGAGCTGAA    | CAGATCCACGACGGACACA     | NM_008084.2    | Gapdh   |
| <b>Gdf10</b>   | CCCAAATCCTTTGACGCCTAC    | CAATGCCACAGCTCTGAC      | NM_145741.2    | Gdf10   |
| <b>Gli1</b>    | CAGAATCGGACCCACTCCAA     | GCGAGCTGGGATCTGTGTA     | NM_010296.2    | Gli1    |
| <b>HOXA2</b>   | GAAGAAGGCGGCCAAGAAA      | GCTGCCATCAGCTATTTCCA    | NM_010451.1    | Hoxa2   |
| <b>Ihh</b>     | TCTTCAAGGACGAGGAGAACAC   | AGATGGCCAGTGAGTTCAGAC   | NM_010544.2    | Ihh     |
| <b>MIR34A</b>  | TGTCTTAGCTGGTTGTTGTGAGTA | GCAGCACTTCTAGGGCAGTA    | NR_029751.1    | Mir34a  |
| <b>MIR34B</b>  | CTCGGTTTGTAGGCAGTGTA     | TGTTTTGATGGCAGTGGAGTTA  | NR_029655.1    | Mir34b  |
| <b>MIR34C</b>  | AGTTACTAGGCAGTGTAGTTAGC  | TTACCTGGCTGTGTGGTTAG    | NR_029654.1    | Mir34c  |
| <b>Mmp10</b>   | ACGTACTTCTTTGTAGGGGACAA  | TGTCTTGGGAAGCCTTTATCCA  | NM_019471.2    | Mmp10   |
| <b>Mmp2</b>    | CGAGGACTATGACCGGGATA     | GGGCACCTTCTGAATTTCCA    | NM_008610.2    | Mmp2    |
| <b>Mmp8</b>    | ACGGTCTTCAGGCTGCTTA      | AGCCACTTAGAGCCCAGTAC    | NM_008611.4    | Mmp8    |
| <b>Mmp9</b>    | TCCCCAAAGACCTGAAAACC     | GGGTGTAACCATAGCGGTAC    | NM_013599.2    | Mmp9    |
| <b>Nfkb1</b>   | ACCGTATGAGCCTGTGTTCA     | GTAGCCTCGTGTCTTCTGTCA   | NM_008689.2    | Nfkb1   |
| <b>Nog</b>     | AGCAAGAAGCTGAGGAGGAA     | TAGGTCATTCCACGCGTACA    | NM_008711.2    | Nog     |
| <b>Pdgfa</b>   | TGTAACACCAGCAGCGTCAA     | GGCTTCTTCCCTGACATACTCCA | NM_008808.3    | Pdgfa   |
| <b>Runx2</b>   | TCTGGCCTTCTCTCTCAGTAA    | AACTGCCTGGGGTCTGAAAA    | NM_009820.4    | Runx2   |
| <b>SATB2</b>   | CCAGGAGTTTGGGAGATGGTA    | TGAAAGGTTCTCTCGCTCCA    | NM_139146.2    | Satb2   |
| <b>SF3B4</b>   | ATGCCCAAGGACAGAGTCAC     | TGGCATAGTCGGCATCTTCC    | NM_153053.4    | Sf3b4   |
| <b>Smad1</b>   | CTCAGCCCATGGACACGAA      | CTCGTAAGCAACTGCCTGAAC   | NM_008539.3    | Smad1   |

|               |                          |                          |                |        |
|---------------|--------------------------|--------------------------|----------------|--------|
| <b>Smad2</b>  | ACAAGTGACCAACAGTTGAACC   | CAGGAGAGAGAGTAGTAGGAGACA | NM_001252481.1 | Smad2  |
| <b>Smad3</b>  | TGCAGCCGTGGAACCTTACAA    | AAAGACCTCCCCTCCGATGTA    | NM_016769.4    | Smad3  |
| <b>Smad4</b>  | CCAACATTCCTGTGGCTTCC     | GCTATCTGCAACAGTCCTTAC    | NM_008540.2    | Smad4  |
| <b>Smad5</b>  | CCCAGCCTATGGATAACAAGCA   | CTCATAGGCGACAGGCTGAA     | NM_008541.3    | Smad5  |
| <b>Sost</b>   | CTCCCCACCATCCCTATGAC     | CTGTCAGGAAGCGGGTGTA      | NM_024449.5    | Sost   |
| <b>Sox9</b>   | AGTACCCGCATCTGCACAA      | GTCTCTTCTCGCTCTCGTTCA    | NM_011448.4    | Sox9   |
| <b>Sp7</b>    | AGGATGGCGTCCTCTCTG       | AGAGCCGCCAAATTTGCT       | NM_130458.3    | Sp7    |
| <b>SPP1</b>   | TGCCTGACCCATCTCAGAA      | AAGTCATCCTTTTCTTCAGAGGAC | NM_009263.3    | Spp1   |
| <b>Tgfb1</b>  | GCTGCGCTTGCAGAGATTAA     | GTAACGCCAGGAATTGTTGCTA   | NM_011577.1    | Tgfb1  |
| <b>Tgfb2</b>  | GCCCATATCTATGGAGTTCAGACA | AGCGGAAGCTTCGGGATTTA     | NM_009367.3    | Tgfb2  |
| <b>Tgfb3</b>  | TCAGGCCCTTGCCCATAC       | CTCTGGGTTTCAGGGTGTTGTA   | NM_009368.3    | Tgfb3  |
| <b>Tgfbr1</b> | AATTGCTCGACGCTGTTCTA     | ACCGATGGATCAGAAGGTACA    | NM_009370.2    | Tgfbr1 |
| <b>Tgfbr2</b> | TCTGTGAGAAGCCGCATGAA     | GGCAAACCGTCTCCAGAGTAA    | NM_009371.3    | Tgfbr2 |
| <b>Tgfbr3</b> | TGGTGTGGCATGTGAAGACA     | GATGAAAACCTGGACCACAGAACC | NM_011578.3    | Tgfbr3 |
| <b>Trp53</b>  | CACAGCGTGGTGGTACCTTA     | CCCATGCAGGAGCTATTACACA   | NM_011640.3    | Trp53  |
| <b>Twist1</b> | CATGTCCGCGTCCCCTA        | TGTCCATTTTCTCCTTCTCTGGAA | NM_011658.2    | Twist1 |
| <b>Vegfa</b>  | CCAGCACATAGGAGAGATGAG    | CTGGCTTTGTTCTGTCTTTCTT   | NM_001025250.3 | Vegfa  |
| <b>Vegfb</b>  | GCCCCAGCCACCAGAA         | GCTGGGCACTAGTTGTTTGAC    | NM_001185164.N | Vegfb  |

## Supplemental Data

### Sup Fig. 1: Mutations in *Satb2* reduce protein levels

**A)** *Satb2* expression determined by qPCR. Green bars reflect expression detected with primers binding at the mutation site. Note the absence of expression for these primers in C9, C4, and C8, all colonies lacking the N-terminal region of *Satb2*. C19 has one WT allele and produces roughly 60% of WT levels of *Satb2* full-length mRNA. Orange bars reflect expression detected with primers binding in the C-terminal region of *Satb2*. Note that all colonies produce mRNA, although not all of this RNA is expected to make protein. **C4 cells over-expressing *Satb2* produce roughly 3.5 times as much *Satb2* mRNA. No RNA is detected at the cut site because the forward primer does not bind in our over-expression construct.** **B)** Western Blot using antibodies directed against *Satb2* (C-terminal region) and *Gapdh*. Note that C19 produces roughly half the amount of *Satb2* protein as WT, as predicted by mRNA levels. C9 produces two separate proteins, including a shorter protein predicted to lack 40 N-terminal amino acids (asterisk). C4 also produces the short protein although at much lower levels, and C8 produces no protein. **C)** Second blot showing *Satb2* bands at higher intensity, where the shorter protein can be seen more clearly.

### SupFig2: *Satb2* expression is more closely related to cell cycle genes than osteogenic genes

Hierarchical clustering analysis of single cell gene expression. Individual cells are in columns. Genes are in rows. A cluster of highly expressing *Satb2* cells (black rectangle) is associated with high levels of cell cycle regulators associated with the S and G2 phases of the cell cycle (**bold magenta**). *Satb2* is listed in **bold green**.

### Sup Fig. 3: *Satb2* levels exhibit population-level variation

Undifferentiated (T0) WT cells were stained with **A)** Hoechst to identify DNA (blue) and immunostained for **B)** BrdU (green) and **C)** *Satb2* (pink). Three *Satb2* expression classes were defined. Class 1 (pink ovals) represents low *Satb2* levels, class 2 (white ovals) represents medium *Satb2* levels, and class 3 (yellow ovals) represents high *Satb2* levels. The asterisk indicates a metaphase cell, and the caret indicates recently divided, early G1 phase cells. **D)** Bar graph showing the percentage of total cells per *Satb2* expression class (blue bars) and the percentage of each *Satb2* class that was BrdU positive (green bars).

### Sup Fig 4: Mutations in *Satb2* reduce osteogenic differentiation.

**A)** Overview scans of wells (left) and 4x magnification of Alizarin Red staining on WT, C19, C9, C4, and C8 cells after 0 (T0), 7 (T7), 14 (T14), and 21 days (T21) of differentiation. Data are shown for seeding densities of 100,000 cells. **B)** Quantification of Alizarin red staining at T21 after extraction. Data represent the means of 3 replicates with standard deviation. Asterisk indicates significant difference from WT ( $p=0.037$ ).

### Sup Fig 5: Mutations in *Satb2* dysregulate gene expression during differentiation

Genes whose expression is positively correlated with *Satb2* with a correlation coefficient 0.5 and above are shown for **A)** WT and **B)** C9. Each point on the x-axis shows expression levels in a single cell (30 cells for WT; 26 cells for C9).

### Sup Fig 6: *Satb2* N-terminal disorder domain and protein folding

Predicted structure of **A)** wild-type (WT) and **B)** 40 amino acid N-terminal deletion (MT) proteins produced by the Phyre<sup>2</sup> software (Kelley *et al.*, 2015). **C)** Sequence, secondary structure, and disorder confidence predictions for the 40 amino acid N-terminal region of *Satb2*.

### Supplementary Table 1: List of Fluidigm Delta Gene Assays

Genes and primer sequences used for single-cell qPCR Biomark analysis are listed.
